# Supplementary material for: Pneumococcal capsule expression is controlled through a conserved, distal cis-regulatory element during infection
Source: PubMed Central journal article supplement (PMC9888711; doi:10.1371/journal.ppat.1011035), 2023-01-31

Figure S1

A

| Factor | Mascot score | Pcps       |            | 37-CE      |            | 37-CEs     |            |
|--------|--------------|------------|------------|------------|------------|------------|------------|
|        |              | # peptides | % coverage | # peptides | % coverage | # peptides | % coverage |
| SpxR   | 442          | 6          | 17         | 27         | 41         | -          | -          |
| MalR   | 282          | 4          | 15         | 1          | 4          | -          | -          |
| CpsR   | 280          | 3          | 13         | 2          | 9          | -          | -          |
| HlpA   | 145          | 2          | 20         | 4          | 48         | -          | -          |
| FabT   | 108          | 1          | 10         | -          | -          | -          | -          |
| Top I  | 72           | 1          | 4          | 6          | 11         | 2          | 10         |
| Cbf1   | 2178         | 34         | 76         | 24         | 52         | 12         | 38         |

B

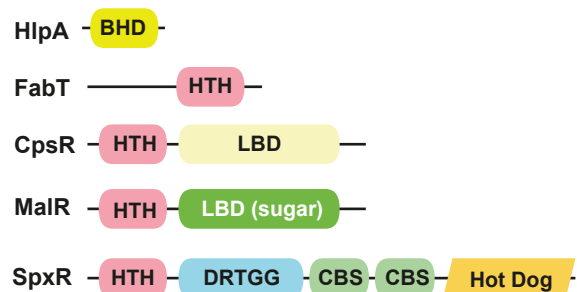

C

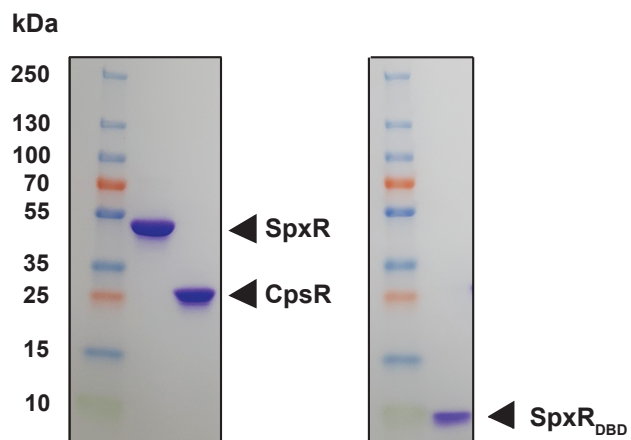

D

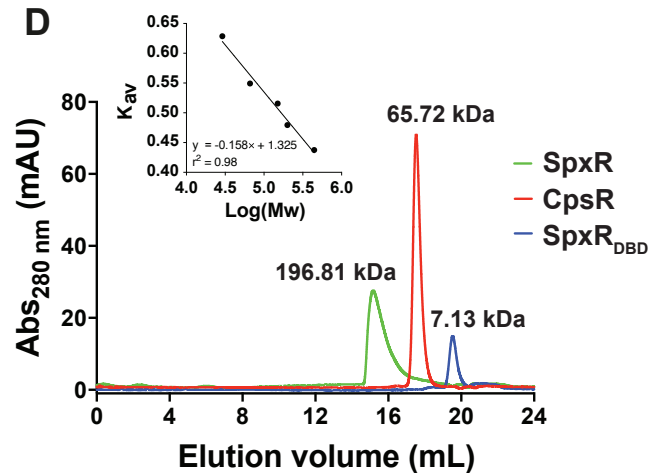

Supplement: ppat.1011035.s001.pdf [file ppat.1011035.s001.pdf]
